# Supplementary material
Source: publisher site journal article supplement (https://www.spandidos-publications.com/2535/downloadSupplementary)

Figure S1. Representative flow cytometry plots. HSCs were isolated from healthy control mice and cultured *in vitro* for 1 day to obtain primary-1-day HSCs. Subsequently, primary-1-day HSCs were transfected with miR-375 mimic and its corresponding control. Representative flow cytometry plots of: (A) primary-1-day HSCs transfected with miR-375 mimic or pre-NC; (B) primary-1-day HSCs transfected with miR-375 mimic and at 48 h post-transfection, cultured in DMEM supplemented with 0.3  $\mu$ M SAG (an exogenous hedgehog agonist) for 24 h; and (C) primary-1-day HSCs transfected with miR-375 mimic, miR-375 mimic + pcDNA-RAC1 or the corresponding controls. HSC, hepatic stellate cell; miR, microRNA; NC, negative control; SAG, smoothened agonist; RAC1, Rac family small GTPase 1.

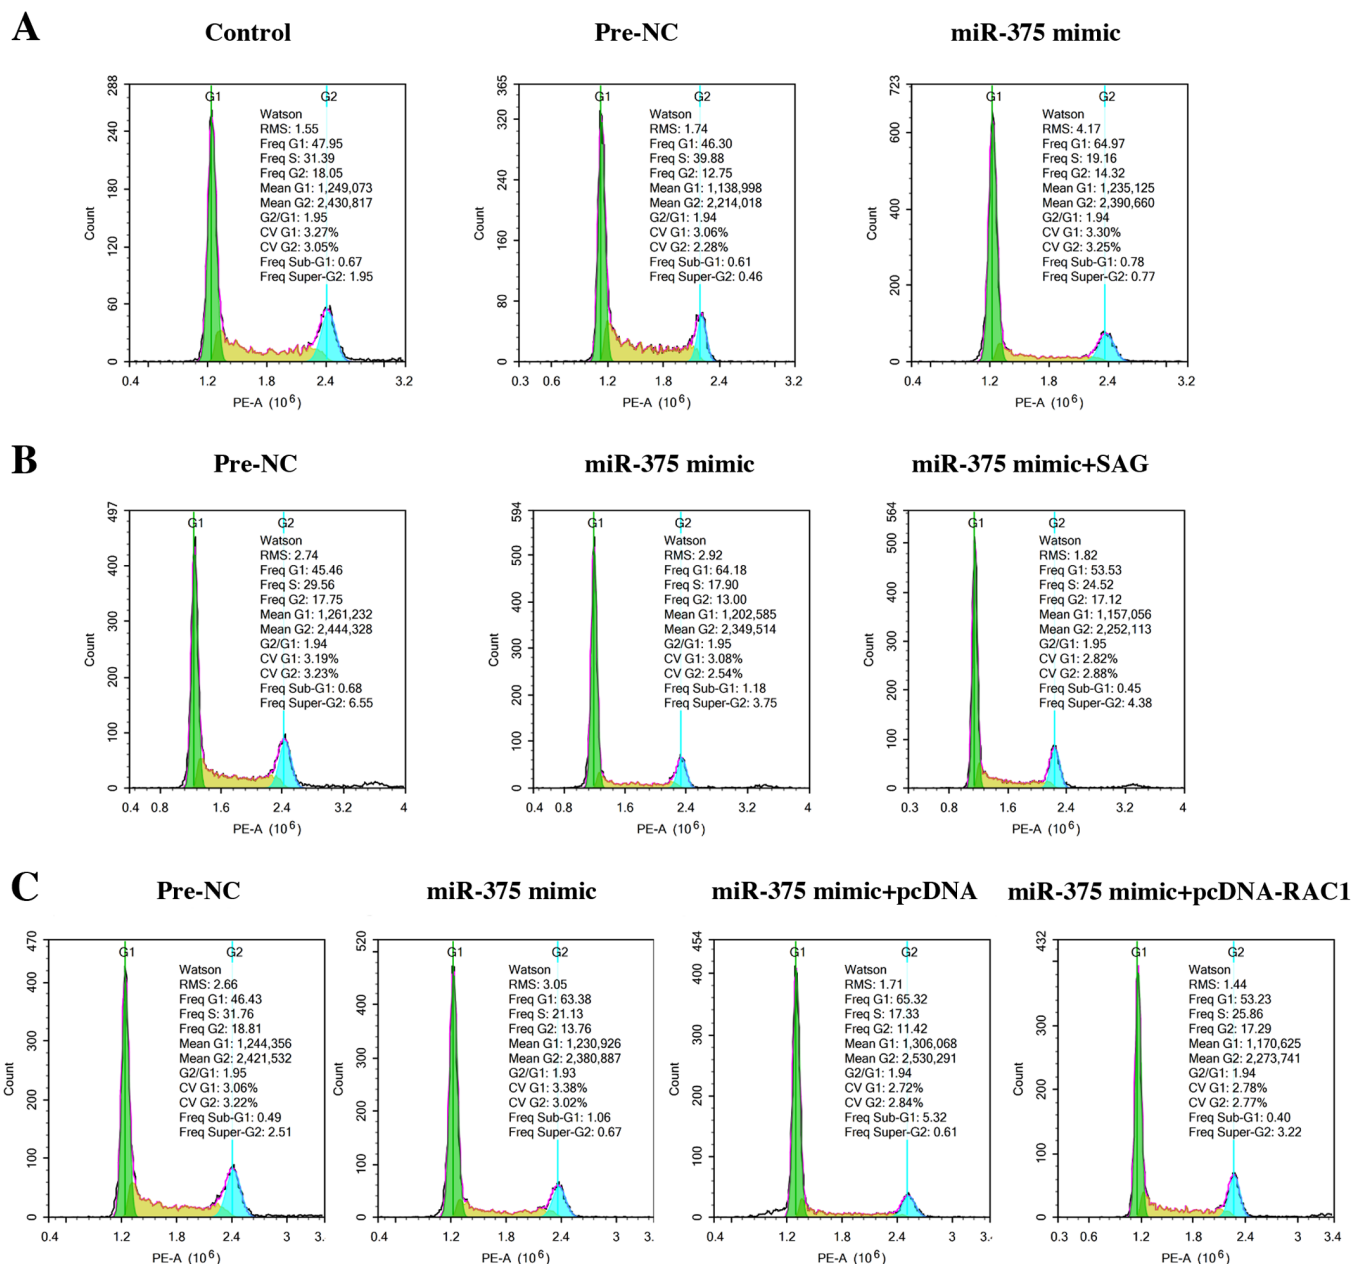

Supplement: Supplementary file 1 [file downloadSupplementary]
